# Supplementary material for: Clinical and genetic factors associated with regression in children with autism spectrum disorders
Source: Research Square preprint supplement (doi:10.21203/rs.3.rs-6801394/v1), 2025-06-18
Supplement: Supplementary file 1 [file 5def519cadfcaf31226418c5.docx]

|  | **Non-regASD (n=432)** | **regASD (n=74)** | **p-value** |
| --- | --- | --- | --- |
| **Miscarriage** | 99 (25.06%) | 13 (18.57%) | 0.308 |
| **Number of miscarriage** | 1.64 (0.92) | 3.00 (2.06) | 0.084 |
| **Assisted reproduction** | 28 (6.91%) | 2 (2.78%) | 0.285 |
| **Folates supplementation** | 171 (45.97%) | 25 (36.76%) | 0.204 |
| **Gestational diabetes** | 44 (10.21%) | 10(13.51%) | 0.518 |
| **Threat of premature labor** | 33 ( 7.66%) | 2 ( 2.70%) | 0.193 |
| **HBP** | 21 (4.87%) | 7 ( 9.46%) | 0.188 |
| **Placenta Praevia** | 5 ( 1.16%) | 0 ( 0.00%) | 0.767 |
| **PRM** | 6 ( 1.39%) | 1 ( 1.35%) | >0.999 |
| **MFI** | 6 ( 1.39%) | 1 ( 1.35%) | >0.999 |
| **Intra-uterine growth retardation** | 18 ( 4.18%) | 1 ( 1.35%) | 0.396 |
| **Fetal hypoxia** | 1 (0.23%) | 2 (2.70%) | 0.083 |
